# Supplementary material for: Scaffold hopping based designing of selective ALDH1A1 inhibitors to overcome cyclophosphamide resistance: synthesis and biological evaluation
Source: Royal Society of Chemistry journal article supplement (doi:10.1039/d3md00543g), 2023-11-30

**Scaffold Hopping Based Designing of Selective ALDH1A1 Inhibitors to Overcome  
Cyclophosphamide Resistance: Synthesis and Biological Evaluation**

Gera Narendra<sup>1</sup>, Baddipadige Raju<sup>1</sup>, Himanshu Verma<sup>1</sup>, Manoj Kumar<sup>1</sup>, Subheet Kumar Jain<sup>2</sup>,  
Gurleen Kaur Tung<sup>3</sup>, Shubham Thakur<sup>2</sup>, Rasdeep Kaur<sup>4</sup>, Satwinderjeet Kaur<sup>4</sup>, Bharti Sapra<sup>1</sup>, Om  
Silakari<sup>1\*</sup>

<sup>1</sup>*Department of Pharmaceutical Sciences and Drug Research, Punjabi University, Patiala,  
Punjab, 147002, India*

<sup>2</sup>*Department of Pharmaceutical Sciences, Guru Nanak Dev University, Amritsar, India*

<sup>3</sup>*Centre for Basic and Translational Research in Health Sciences, Guru Nanak Dev University,  
Amritsar, India*

<sup>4</sup>*Department of Botany and Environmental Sciences, Guru Nanak Dev University, Amritsar,  
India*

\*Corresponding authors E-mail: [mm1pup73@gmail.com](mailto:mm1pup73@gmail.com); Tel: +91-9501542696; Fax: +91  
1752283075

## Mafosfamide sensitivity assay description

Enhancement of tumor cell sensitivity to mafosfamide with ALDH1A1 inhibitors involved simultaneous treatment of cells with mafosfamide (Maf) in combination with ALDH1A1 inhibitors. To determine the approximate IC<sub>50</sub> value of mafosfamide, an initial concentration of 1000  $\mu$ M was employed for A549 and Mia PaCa-2 cells. The IC<sub>50</sub> maf in A549 and Mia PaCa-2 cells was observed as 276.09  $\mu$ M and 256.17  $\mu$ M. After optimization, A549 (5000 cells per well) and Mia PaCa-2 (5000 cells per well) cells were seeded in 96-well plates. Following a 29-hour incubation period, A549 and Mia PaCa-2 cells were treated with ALDH1A1 inhibitors (A1, A2, and A3) alone. Notably, compounds A2 and A3 exhibited no significant anticancer activity, while compound A1 demonstrated anticancer activity at approximately 370  $\mu$ M against both A549 and Mia PaCa-2 cells. In subsequent combination studies, Compound A1 was used at a concentration lower than 370  $\mu$ M as the initial stock preparation, with further dilutions made from this stock. Because at <370  $\mu$ M concentration, compound A1 doesn't have anti-cancer activity, so, that concentration will not affect the original maf anti-cancer activity when treated in the combination. In contrast, compounds A2, A3, and maf were prepared as stocks with a concentration of 1000  $\mu$ M, and subsequent dilutions were made from this initial stock concentration. Then, the MTT assay was conducted after a 19-hour incubation with the inhibitors (0.25% DMSO) and maf. The relative percentage of cell proliferation was calculated in comparison to DMSO-treated (0.25%) controls.

**Table S1:** The top ten scaffolds identified through scaffold hopping

| S. No. | Scaffold                                                                            | Score@ | Field Score <sup>s</sup> | Shape Score <sup>#</sup> |
|--------|-------------------------------------------------------------------------------------|--------|--------------------------|--------------------------|
| 1      | 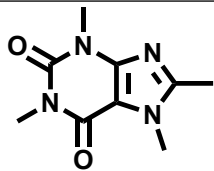 | 0.998  | 0.997                    | 0.998                    |
| 2      |  | 0.966  | 0.936                    | 0.996                    |

|    |                                                                                     |       |       |       |
|----|-------------------------------------------------------------------------------------|-------|-------|-------|
| 3  | 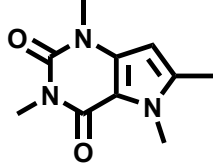   | 0.964 | 0.936 | 0.996 |
| 4  |    | 0.960 | 0.927 | 0.992 |
| 5  |    | 0.941 | 0.906 | 0.976 |
| 6  |    | 0.935 | 0.914 | 0.956 |
| 7  |   | 0.930 | 0.899 | 0.960 |
| 8  |  | 0.924 | 0.911 | 0.937 |
| 9  |  | 0.923 | 0.887 | 0.959 |
| 10 |  | 0.919 | 0.858 | 0.980 |

@The similarity of the resultant molecule to the reference in terms of electrostatic and steric field

§Similarity of the results molecule to the reference in terms of Shape

#Combination of field score and shape score in the ratio defined in scoring option (set as 50%)

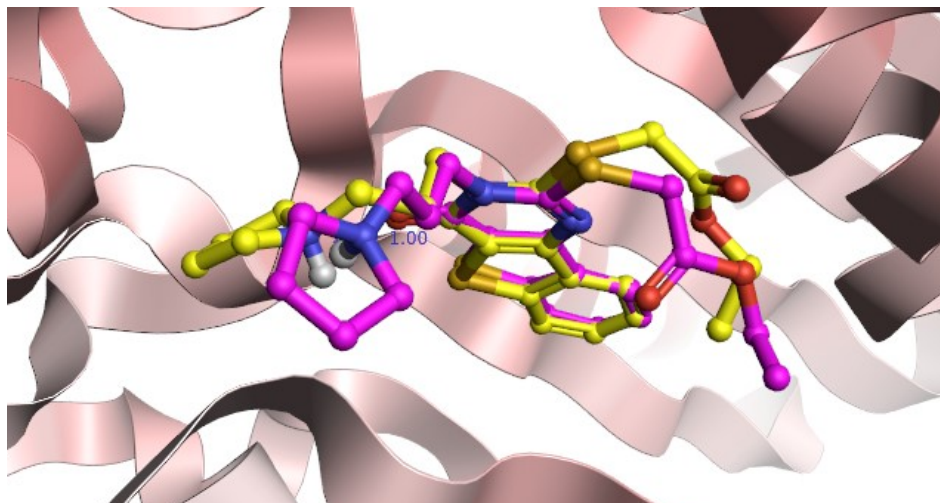

**Figure S1:** Comparison between ALDH1A1 cocrystal ligand (pink) and its redocked ligand pose (yellow)

**Table S2:** Molecular docking scores of top five molecules identified towards ALDH2 and ALDH3A1

| Compound Name | Compound Structure                                                                  | ALDH2                      |                          |                          | ALDH3A1                    |                          |                          |
|---------------|-------------------------------------------------------------------------------------|----------------------------|--------------------------|--------------------------|----------------------------|--------------------------|--------------------------|
|               |                                                                                     | LF rank score <sup>@</sup> | LD dG score <sup>#</sup> | LF VS score <sup>s</sup> | LF rank score <sup>@</sup> | LD dG score <sup>#</sup> | LF VS score <sup>s</sup> |
|               |                                                                                     | kcal/mol                   |                          |                          | Kcal/mol                   |                          |                          |
| A1            | 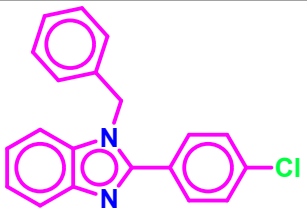   | -1.25                      | -2.65                    | 2.65                     | 2.65                       | 1.95                     | 2.65                     |
| A2            |    | -0.95                      | 2.25                     | -1.42                    | -0.56                      | 1.58                     | 0.87                     |
| A3            |   | -1.36                      | -2.95                    | -2.05                    | 1.65                       | -2.85                    | 0.54                     |
| A4            |  | -3.01                      | -3.38                    | -2.86                    | 2.15                       | 2.65                     | 3.14                     |

|    |                                                                                   |       |       |       |      |       |       |
|----|-----------------------------------------------------------------------------------|-------|-------|-------|------|-------|-------|
| A5 | 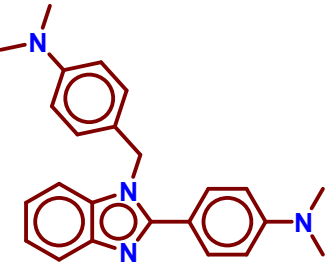 | -1.51 | -1.87 | -1.65 | 3.56 | -2.65 | -3.58 |
|----|-----------------------------------------------------------------------------------|-------|-------|-------|------|-------|-------|

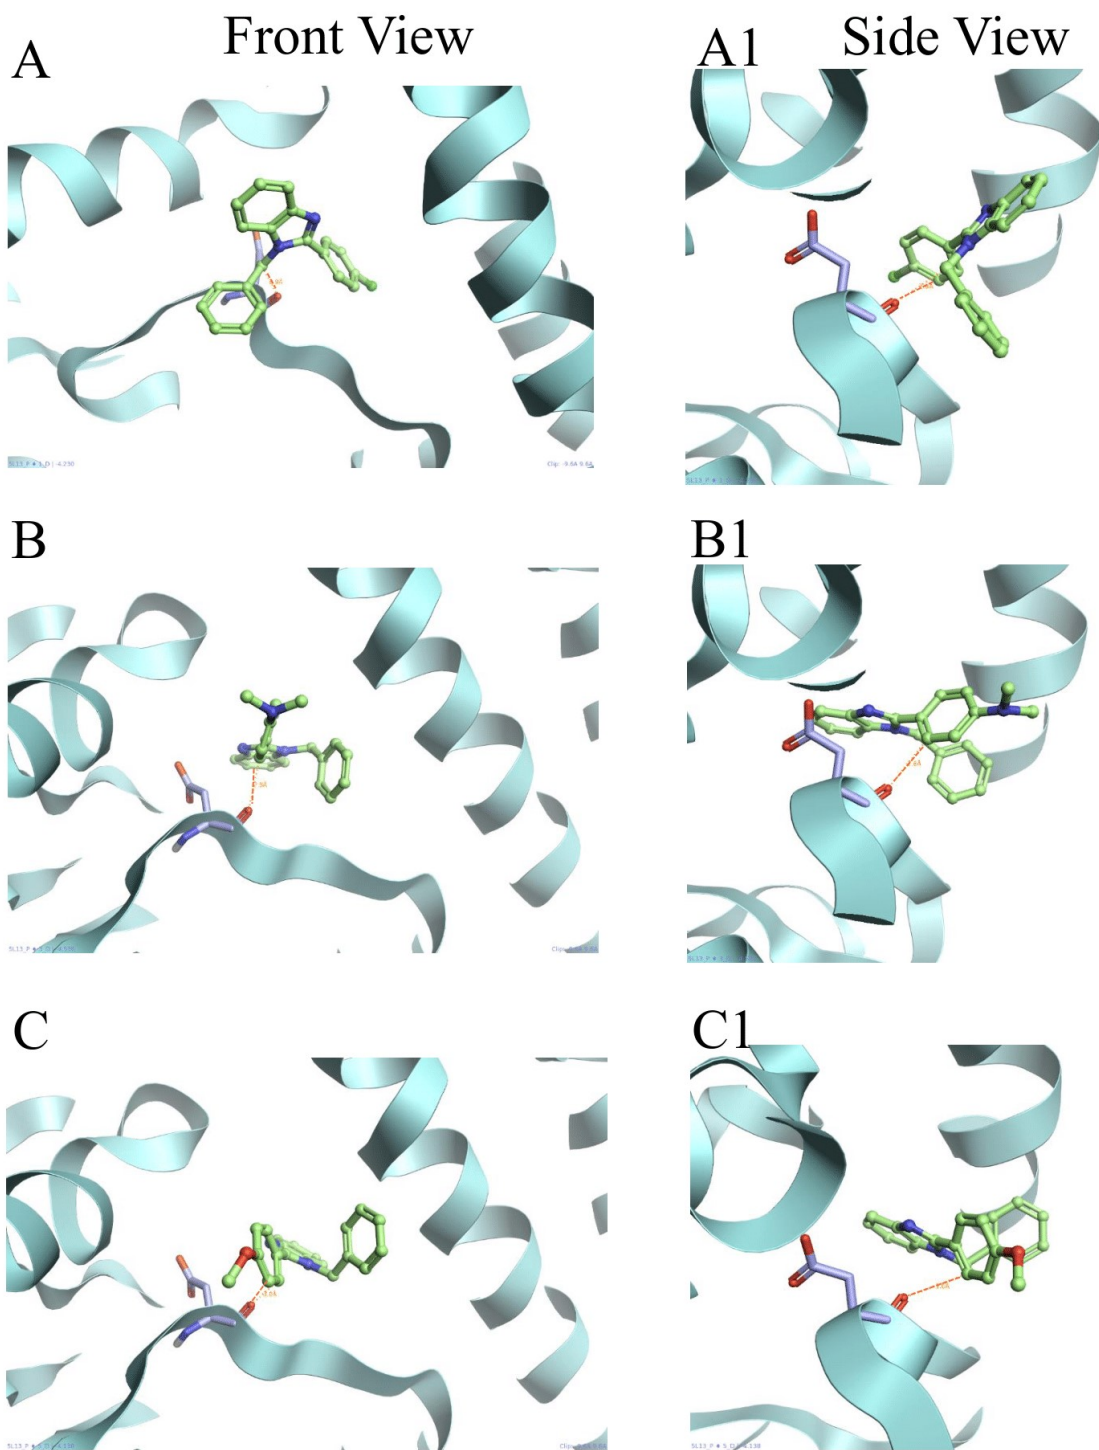

**Figure S2:** The binding poses of the top three compounds, **A** and **A1**) compound A1, **B** and **B1**) compound A2, **C** and **C1**) compound A3 in the active site of ALDH2



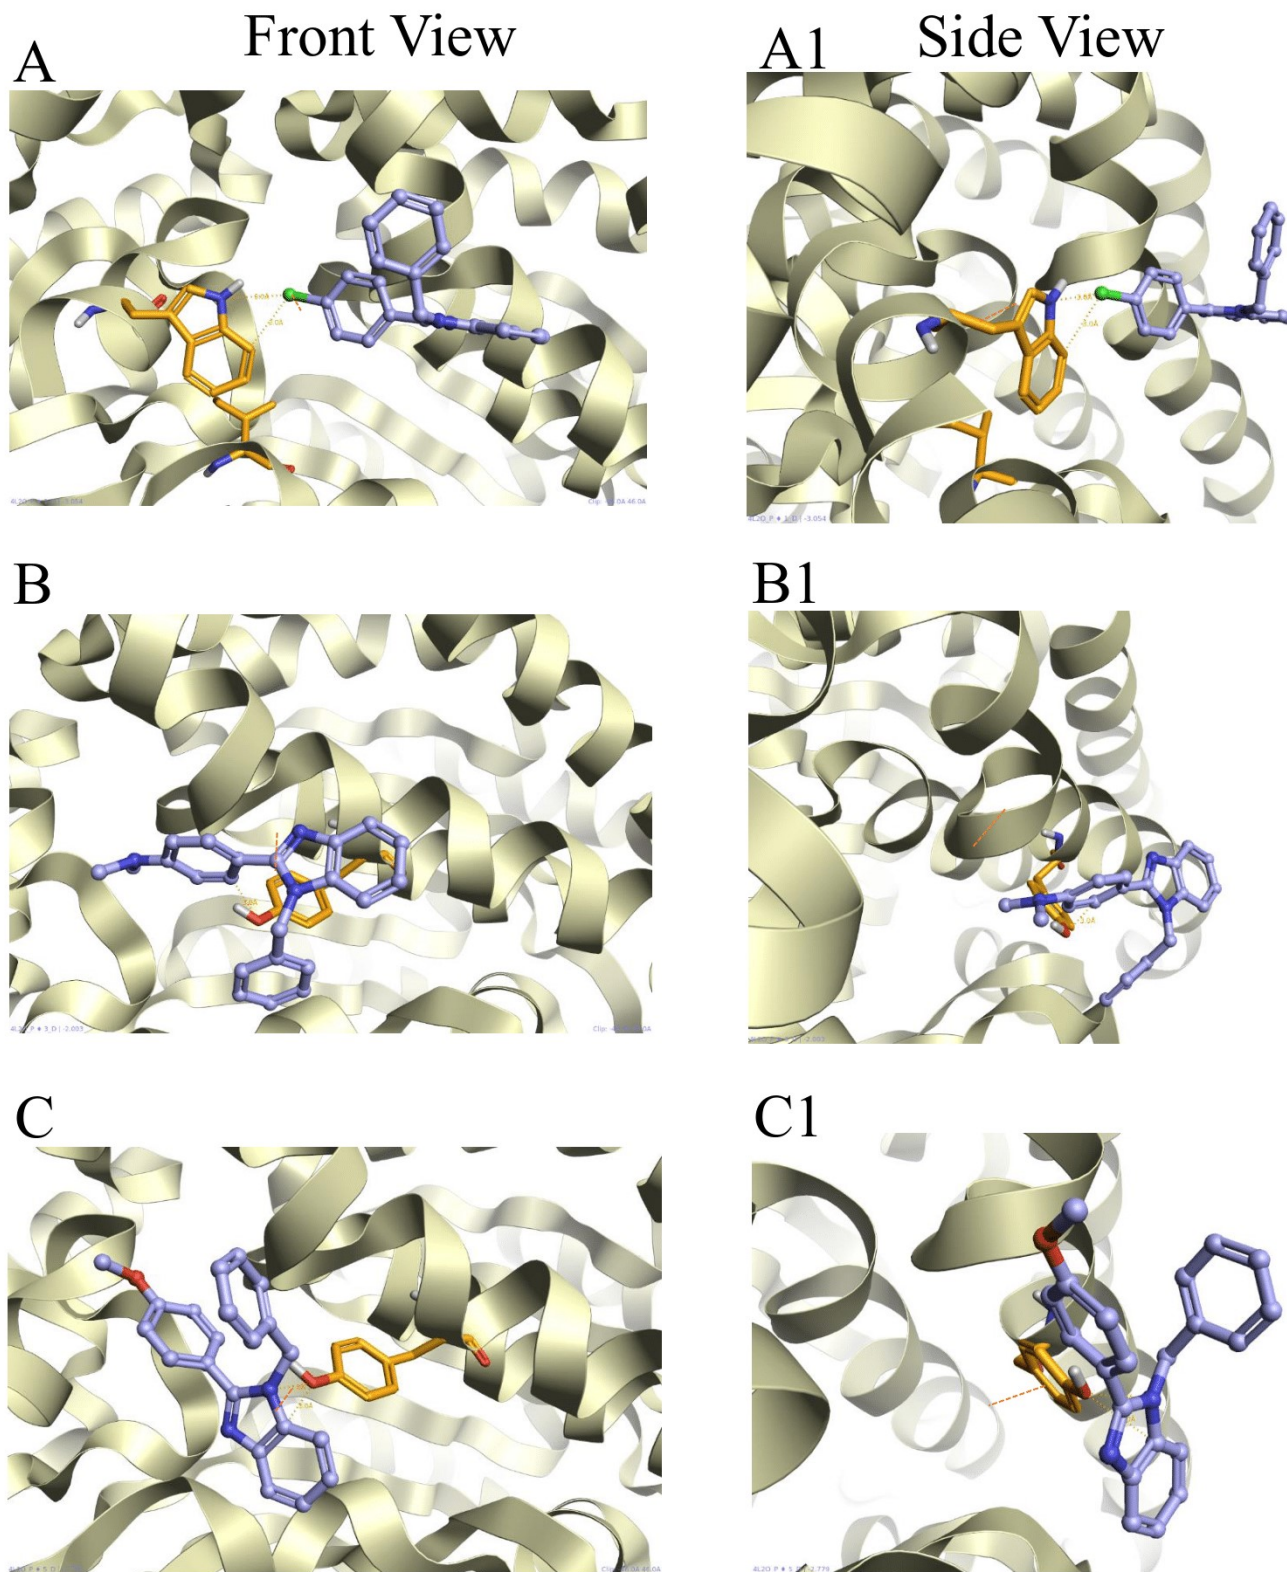

**Figure S3:** The binding poses of the top three compounds, **A** and **A1**) compound A1, **B** and **B1**) compound A2, **C** and **C1**) compound A3 in the active site of ALDH3A1.



N1-FINAL  
 1H\_scan CDC13 {D:\Spectra} nmr 4

A1

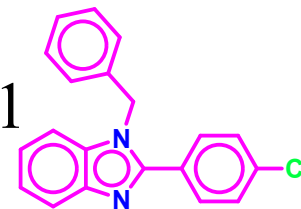

BRUKER  
 AVANCE NEO  
 500 MHz NMR  
 SPECTROMETER  
 SAIF, P.U.

— -0.0002

Current Data Parameters  
 NAME Mar09-2021  
 EXPNO 40  
 PROCNO 1

F2 - Acquisition Parameters  
 Date\_ 20210309  
 Time\_ 15.46 h  
 INSTRUM Avance Neo 500  
 PROBHD Z119470\_0333 (  
 PULPROG zg30  
 TD 65536  
 SOLVENT CDC13  
 NS 8  
 DS 0  
 SWH 14705.883 Hz  
 FIDRES 0.448788 Hz  
 AQ 2.2282240 sec  
 RG 101  
 DW 34.000 usec  
 DE 6.79 usec  
 TE 300.1 K  
 D1 1.00000000 sec  
 TD0 1  
 SFO1 500.1730885 MHz  
 NUC1 1H  
 P0 3.33 usec  
 P1 10.00 usec  
 PLW1 20.93000031 W

F2 - Processing parameters  
 SI 65536  
 SF 500.1700130 MHz  
 WDW EM  
 SSB 0  
 LB 0.30 Hz  
 GB 0  
 PC 1.00

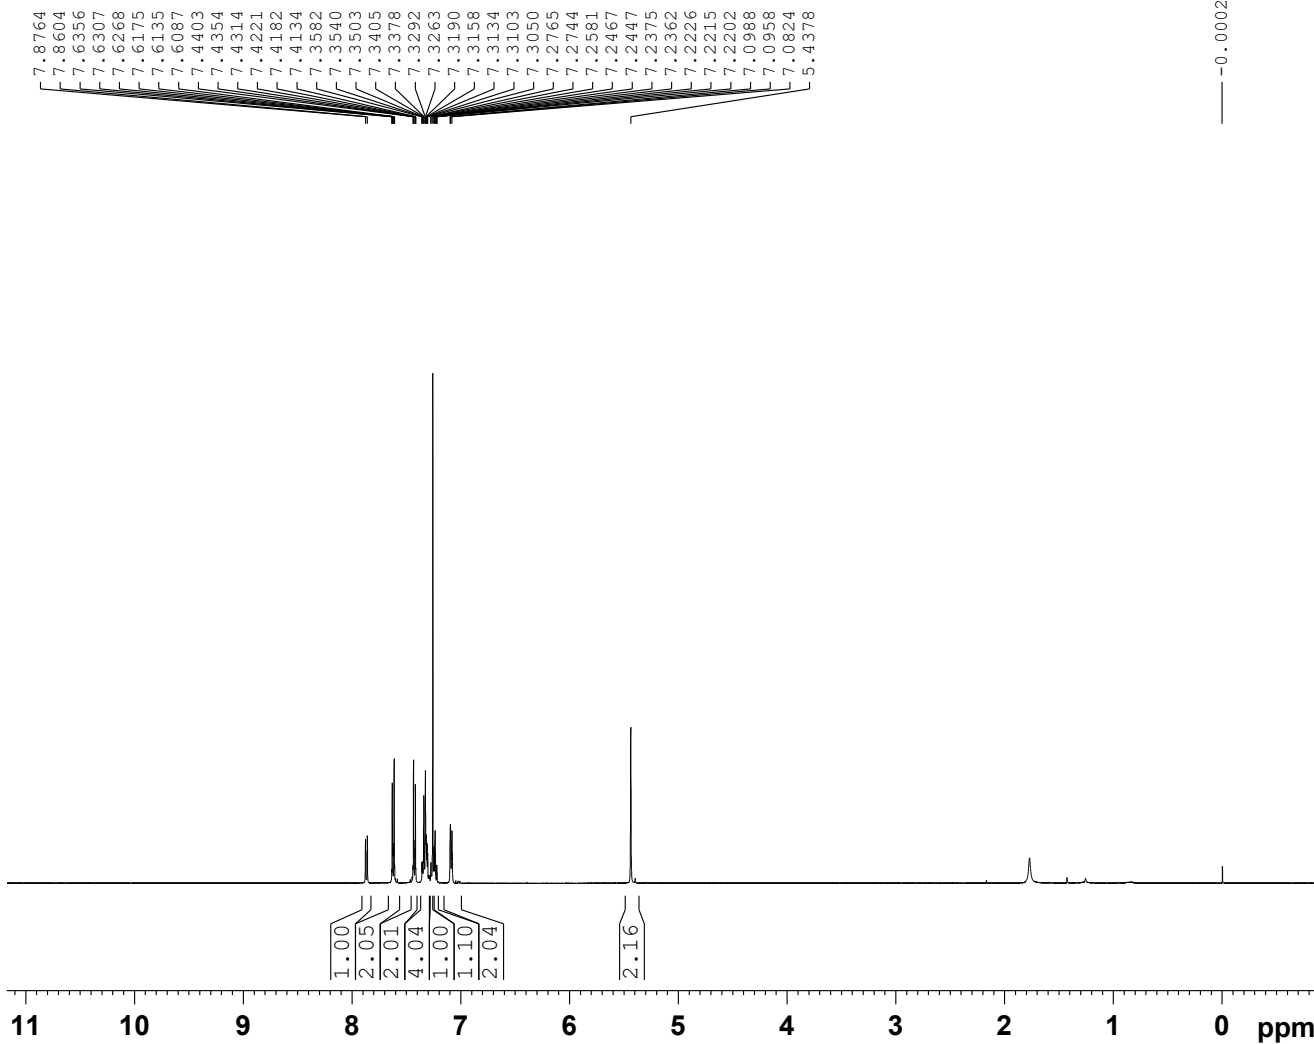

N1-FINAL  
C13CPD CDC13 {D:\Spectra} nmr 25

BRUKER  
AVANCE NEO  
500 MHz NMR SPECTROMETER  
SAIF, PANJAB UNIVERSITY,  
CHANDIGARH

Current Data Parameters  
NAME Mar19-2021  
EXPNO 250  
PROCNO 1

F2 - Acquisition Parameters  
Date\_ 20210319  
Time\_ 16.00 h  
INSTRUM Avance Neo 500  
PROBHD Z119470\_0333 (  
PULPROG zgpg30  
TD 65536  
SOLVENT CDC13  
NS 540  
DS 4  
SWH 37037.035 Hz  
FIDRES 1.130281 Hz  
AQ 0.8847360 sec  
RG 101  
DW 13.500 usec  
DE 6.50 usec  
TE 300.2 K  
D1 2.00000000 sec  
D11 0.03000000 sec  
TD0 1  
SFO1 125.7804233 MHz  
NUC1 13C  
P0 3.33 usec  
P1 10.00 usec  
PLW1 83.14099884 W  
SFO2 500.1720007 MHz  
NUC2 1H  
CPDPRG[2] waltz65  
PCPD2 80.00 usec  
PLW2 20.93000031 W  
PLW12 0.32703000 W  
PLW13 0.16449000 W

F2 - Processing parameters  
SI 32768  
SF 125.7678465 MHz  
WDW EM  
SSB 0  
LB 1.00 Hz  
GB 0  
PC 1.40

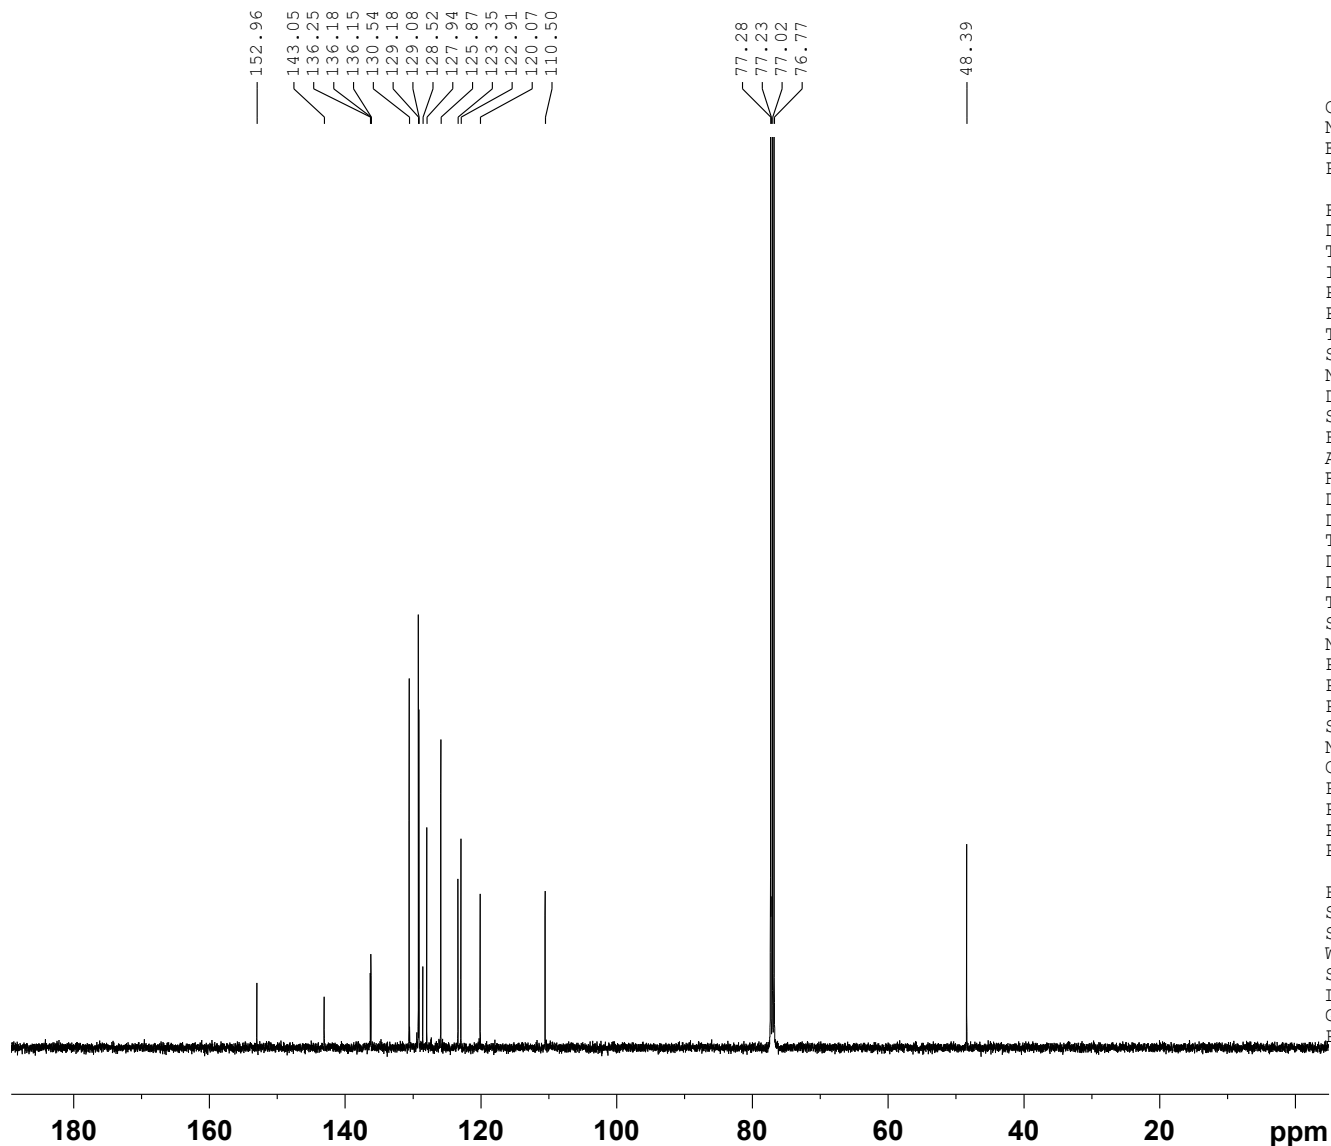

NARENDRA N1-FINAL 232 (3.939) Cm (228:232)

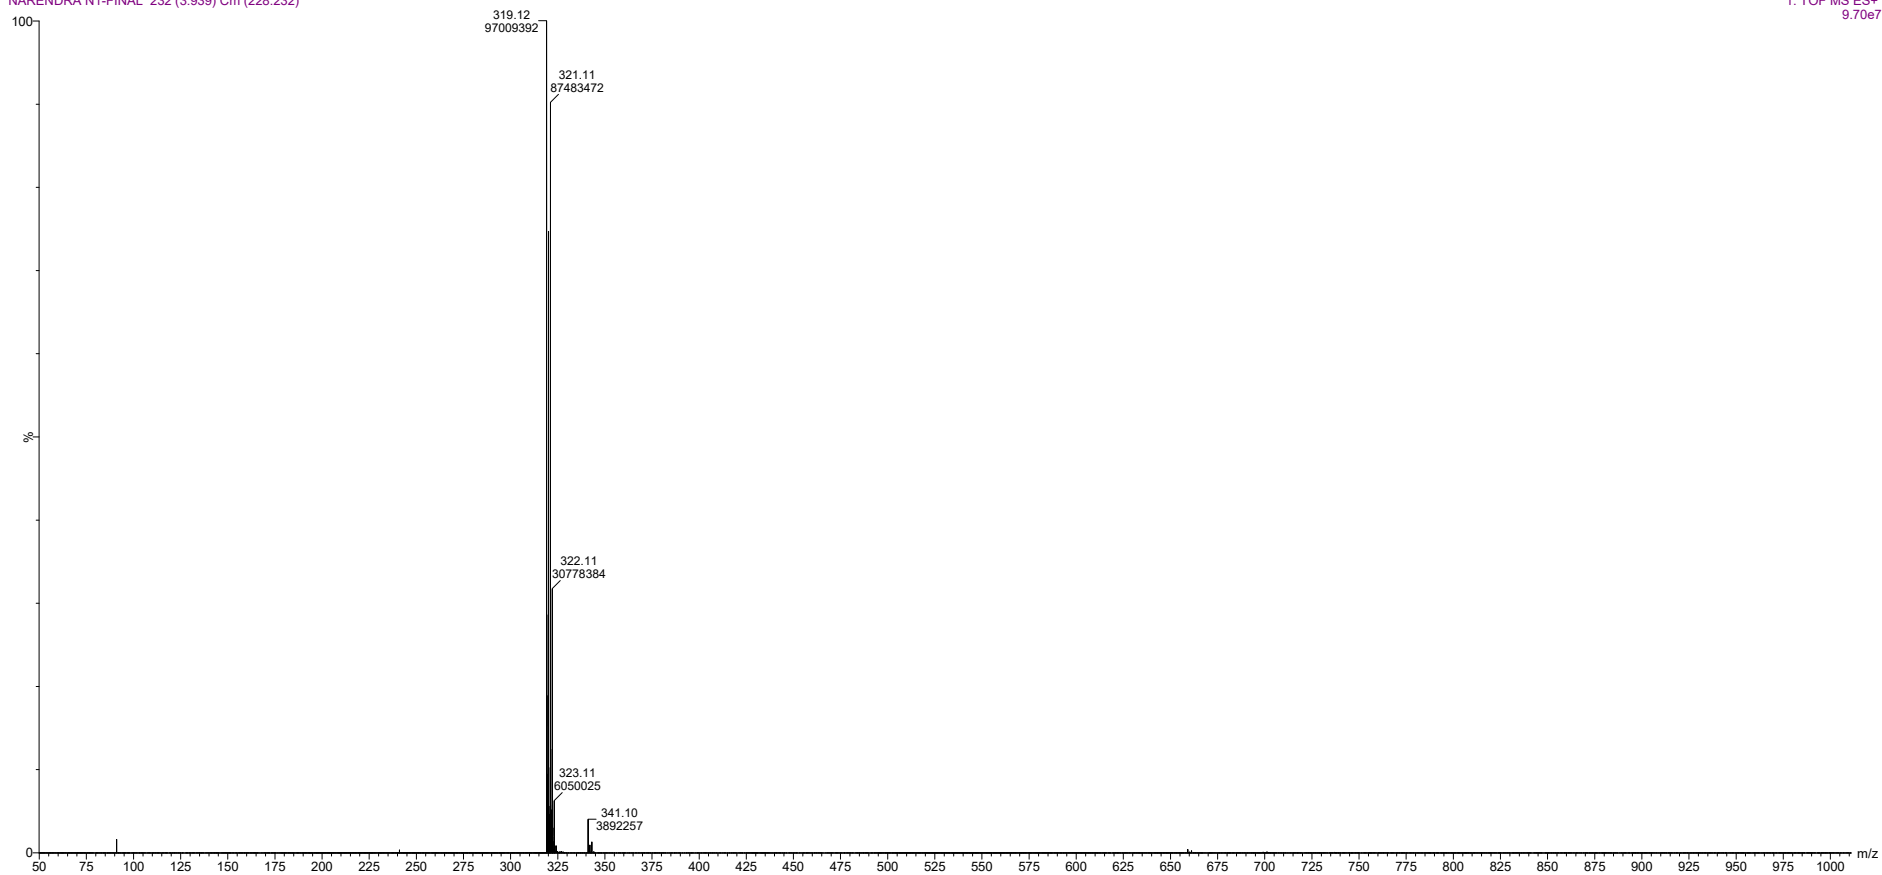

N1.1 FINAL  
 1H\_8scan CDC13 {D:\Spectra} nmr 24

A2

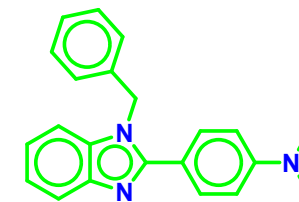

BRUKER  
 AVANCE NEO  
 500 MHz NMR  
 SPECTROMETER  
 SAIF, P.U.

Current Data Parameters  
 NAME Mar19-2021  
 EXPNO 240  
 PROCNO 1

F2 - Acquisition Parameters  
 Date\_ 20210319  
 Time\_ 15.12 h  
 INSTRUM Avance Neo 500  
 PROBHD Z119470\_0333 (  
 PULPROG zg30  
 TD 65536  
 SOLVENT CDC13  
 NS 16  
 DS 0  
 SWH 14705.883 Hz  
 FIDRES 0.448788 Hz  
 AQ 2.2282240 sec  
 RG 101  
 DW 34.000 usec  
 DE 6.79 usec  
 TE 300.2 K  
 D1 1.00000000 sec  
 TD0 1  
 SFO1 500.1730885 MHz  
 NUC1 1H  
 P0 3.33 usec  
 P1 10.00 usec  
 PLW1 20.93000031 W

F2 - Processing parameters  
 SI 65536  
 SF 500.1700138 MHz  
 WDW EM  
 SSB 0  
 LB 0.30 Hz  
 GB 0  
 PC 1.00

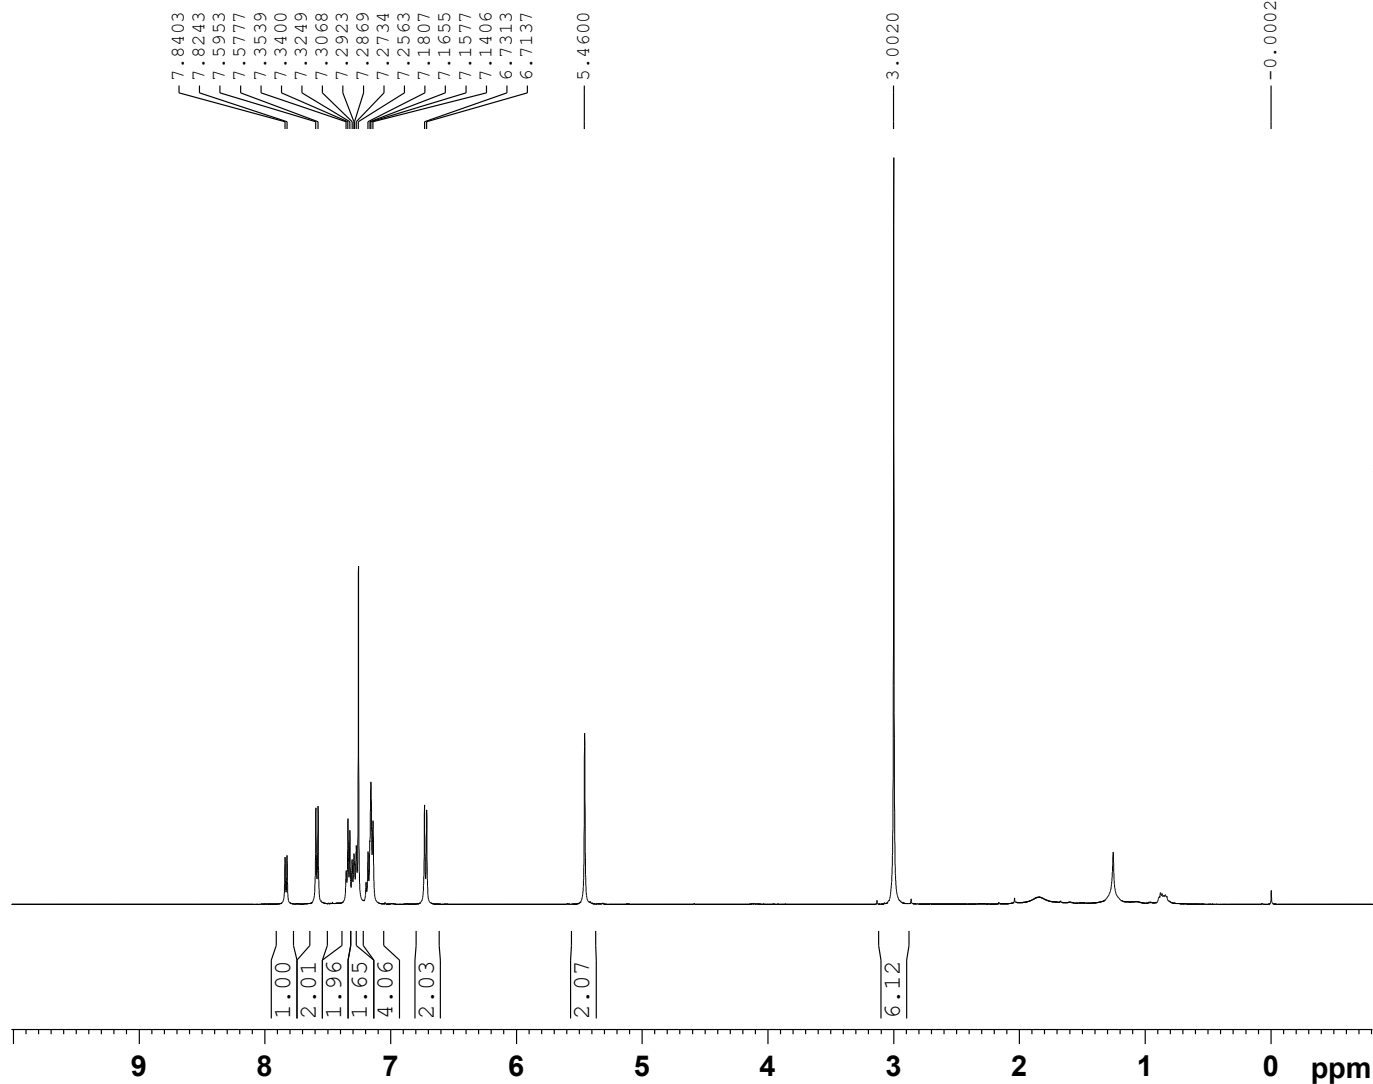

N1.1 FINAL  
C13CPD CDC13 {D:\Spectra} nmr 24

BRUKER  
AVANCE NEO  
500 MHz NMR SPECTROMETER  
SAIF, PANJAB UNIVERSITY,  
CHANDIGARH

Current Data Parameters  
NAME Mar19-2021  
EXPNO 241  
PROCNO 1

F2 - Acquisition Parameters  
Date\_ 20210320  
Time\_ 16.45 h  
INSTRUM Avance Neo 500  
PROBHD Z119470\_0333 (  
PULPROG zgpg30  
TD 65536  
SOLVENT CDC13  
NS 1024  
DS 4  
SWH 37037.035 Hz  
FIDRES 1.130281 Hz  
AQ 0.8847360 sec  
RG 101  
DW 13.500 usec  
DE 6.50 usec  
TE 300.1 K  
D1 2.00000000 sec  
D11 0.03000000 sec  
TD0 1  
SFO1 125.7804233 MHz  
NUC1 13C  
P0 3.33 usec  
P1 10.00 usec  
PLW1 83.14099884 W  
SFO2 500.1720007 MHz  
NUC2 1H  
CPDPRG[2] waltz65  
PCPD2 80.00 usec  
PLW2 20.93000031 W  
PLW12 0.32703000 W  
PLW13 0.16449000 W

F2 - Processing parameters  
SI 32768  
SF 125.7678465 MHz  
WDW EM  
SSB 0  
LB 1.00 Hz  
GB 0  
PC 1.40

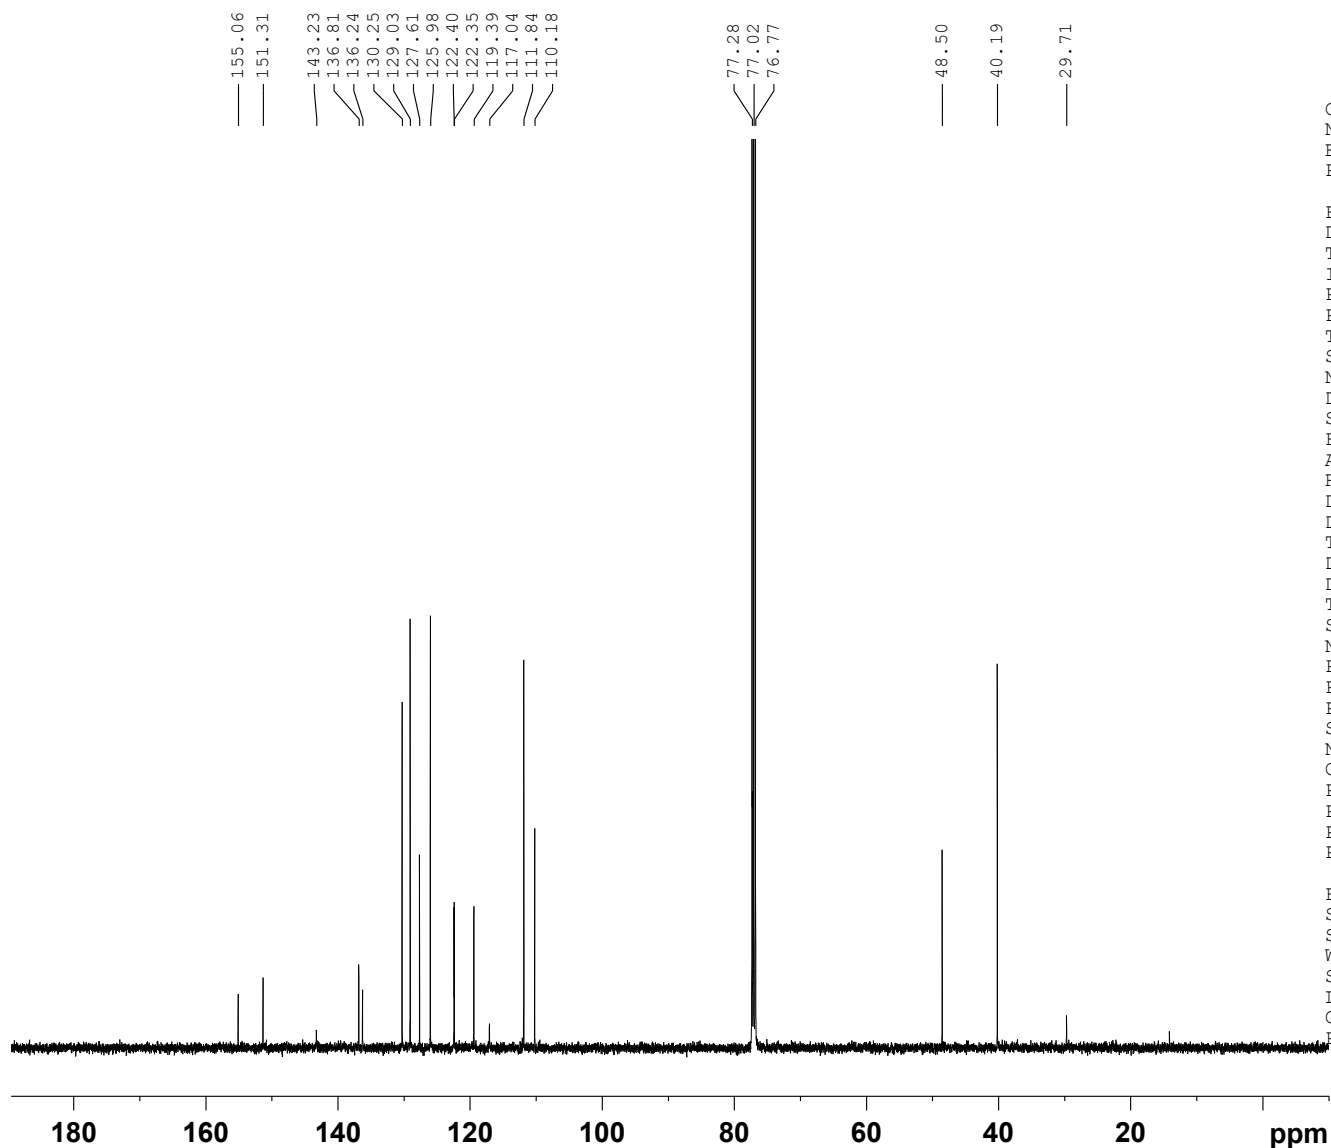

NARENDRA N1-1-FINAL 191 (3.246) Cm (191)

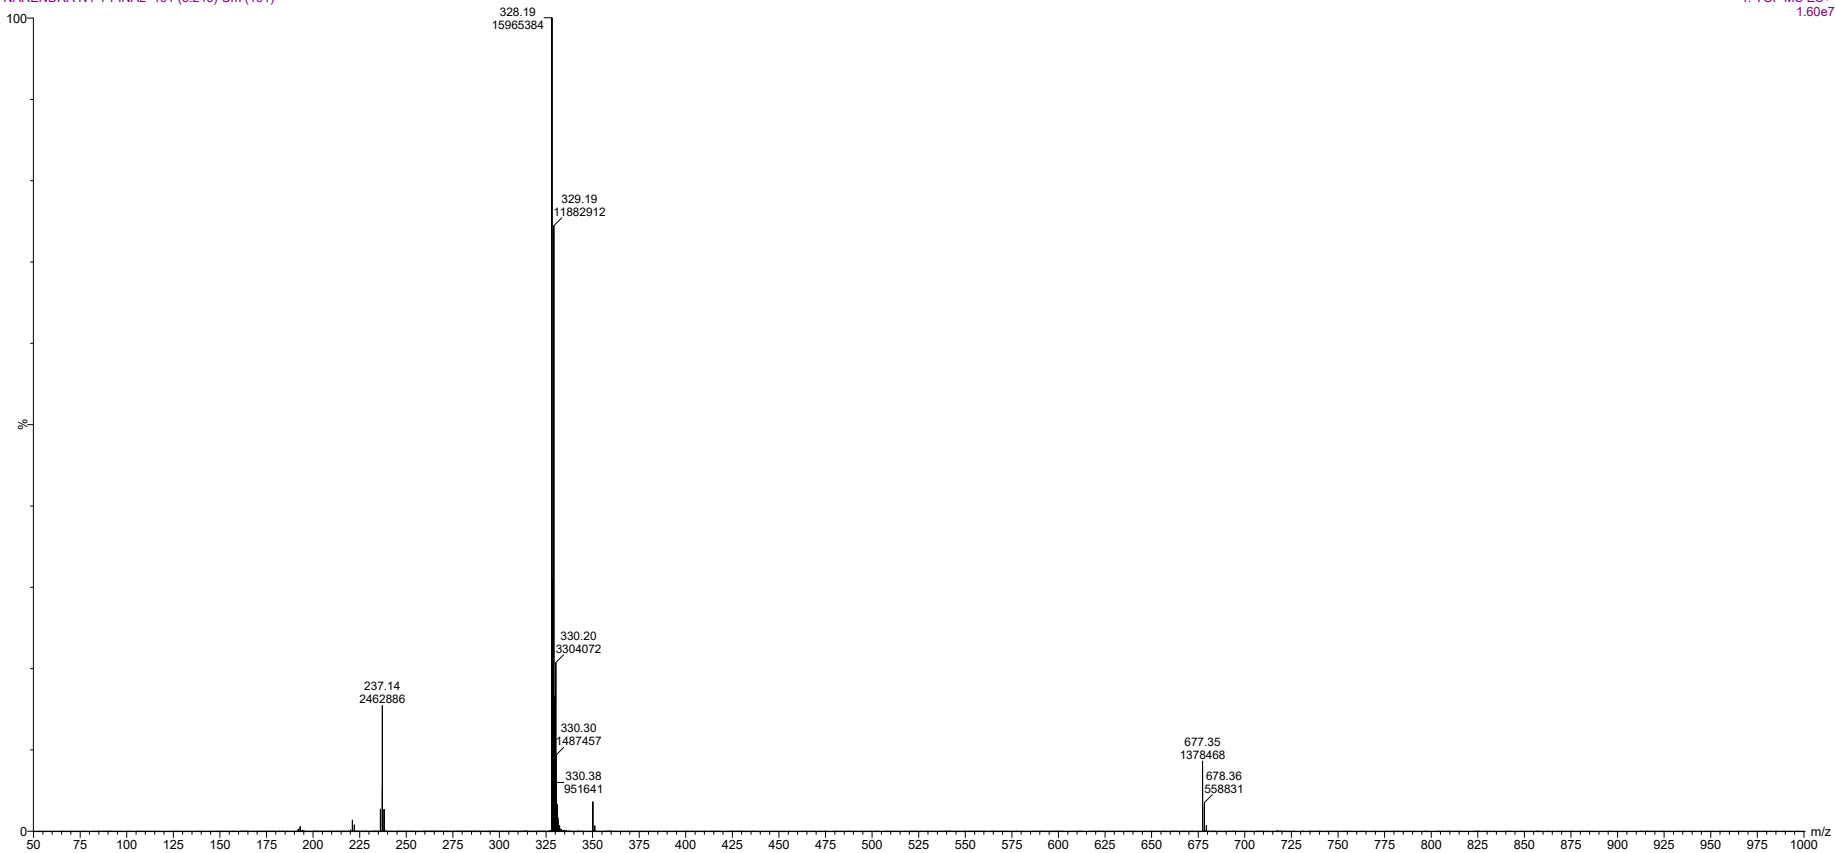

OCH3-BC  
 1H\_8scan CDC13 {D:\Spectra} nmr 14

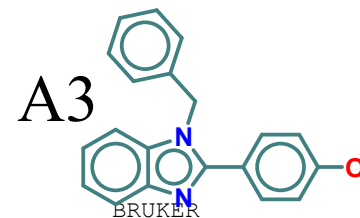

BRUKER  
 AVANCE NEO  
 500 MHz NMR  
 SPECTROMETER  
 SAIF, P.U.

Current Data Parameters  
 NAME Jul105-2021  
 EXPNO 140  
 PROCNO 1

F2 - Acquisition Parameters  
 Date 20210705  
 Time 19.46 h  
 INSTRUM Avance Neo 500  
 PROBHD Z119470\_0333 (  
 PULPROG zg30  
 TD 65536  
 SOLVENT CDC13  
 NS 16  
 DS 0  
 SWH 14705.883 Hz  
 FIDRES 0.448788 Hz  
 AQ 2.2282240 sec  
 RG 101  
 DW 34.000 usec  
 DE 6.79 usec  
 TE 301.0 K  
 D1 1.00000000 sec  
 TD0 1  
 SFO1 500.1730885 MHz  
 NUC1 1H  
 P0 3.33 usec  
 P1 10.00 usec  
 PLW1 20.93000031 W

F2 - Processing parameters  
 SI 65536  
 SF 500.1700141 MHz  
 WDW EM  
 SSB 0  
 LB 0.30 Hz  
 GB 0  
 PC 1.00

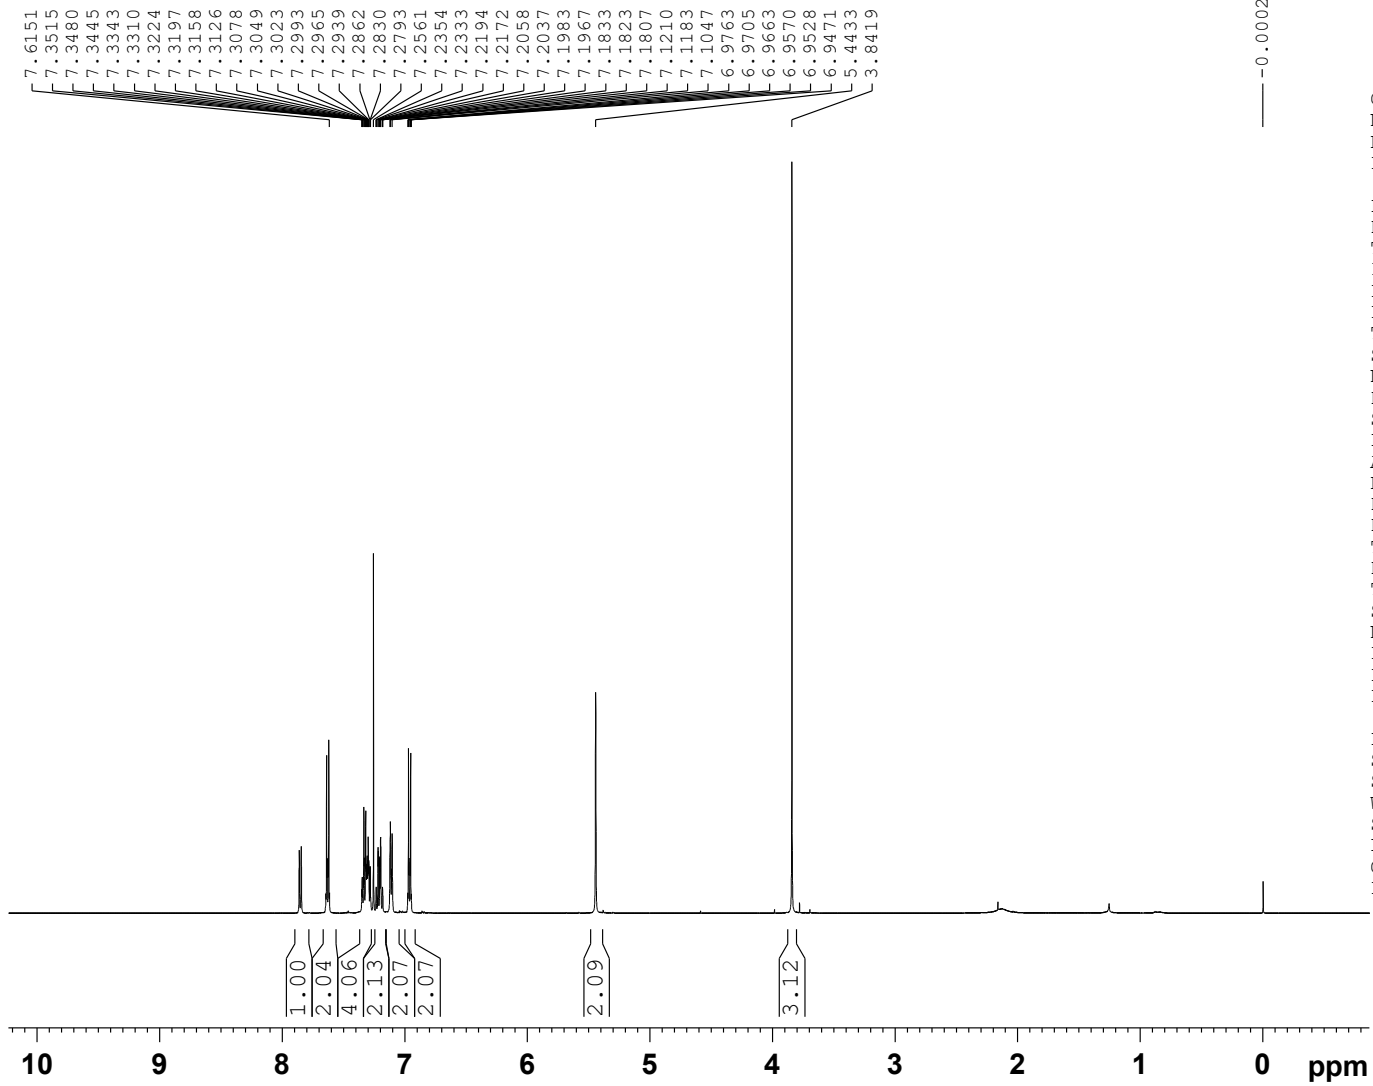



OCH3-BC  
C13CPD CDC13 {D:\Spectra} nmr 14

BRUKER  
AVANCE NEO  
500 MHz NMR SPECTROMETER  
SAIF, PANJAB UNIVERSITY,  
CHANDIGARH

Current Data Parameters  
NAME Jul05-2021  
EXPNO 141  
PROCNO 1

F2 - Acquisition Parameters  
Date\_ 20210705  
Time\_ 20.37 h  
INSTRUM Avance Neo 500  
PROBHD Z119470\_0333 (  
PULPROG zgpg30  
TD 65536  
SOLVENT CDC13  
NS 1024  
DS 4  
SWH 37037.035 Hz  
FIDRES 1.130281 Hz  
AQ 0.8847360 sec  
RG 101  
DW 13.500 usec  
DE 6.50 usec  
TE 301.7 K  
D1 2.00000000 sec  
D11 0.03000000 sec  
TD0 1  
SFO1 125.7804233 MHz  
NUC1 13C  
P0 3.33 usec  
P1 10.00 usec  
PLW1 83.14099884 W  
SFO2 500.1720007 MHz  
NUC2 1H  
CPDPRG[2] waltz65  
PCPD2 80.00 usec  
PLW2 20.93000031 W  
PLW12 0.32703000 W  
PLW13 0.16449000 W

F2 - Processing parameters  
SI 32768  
SF 125.7678465 MHz  
WDW EM  
SSB 0  
LB 1.00 Hz  
GB 0  
PC 1.40

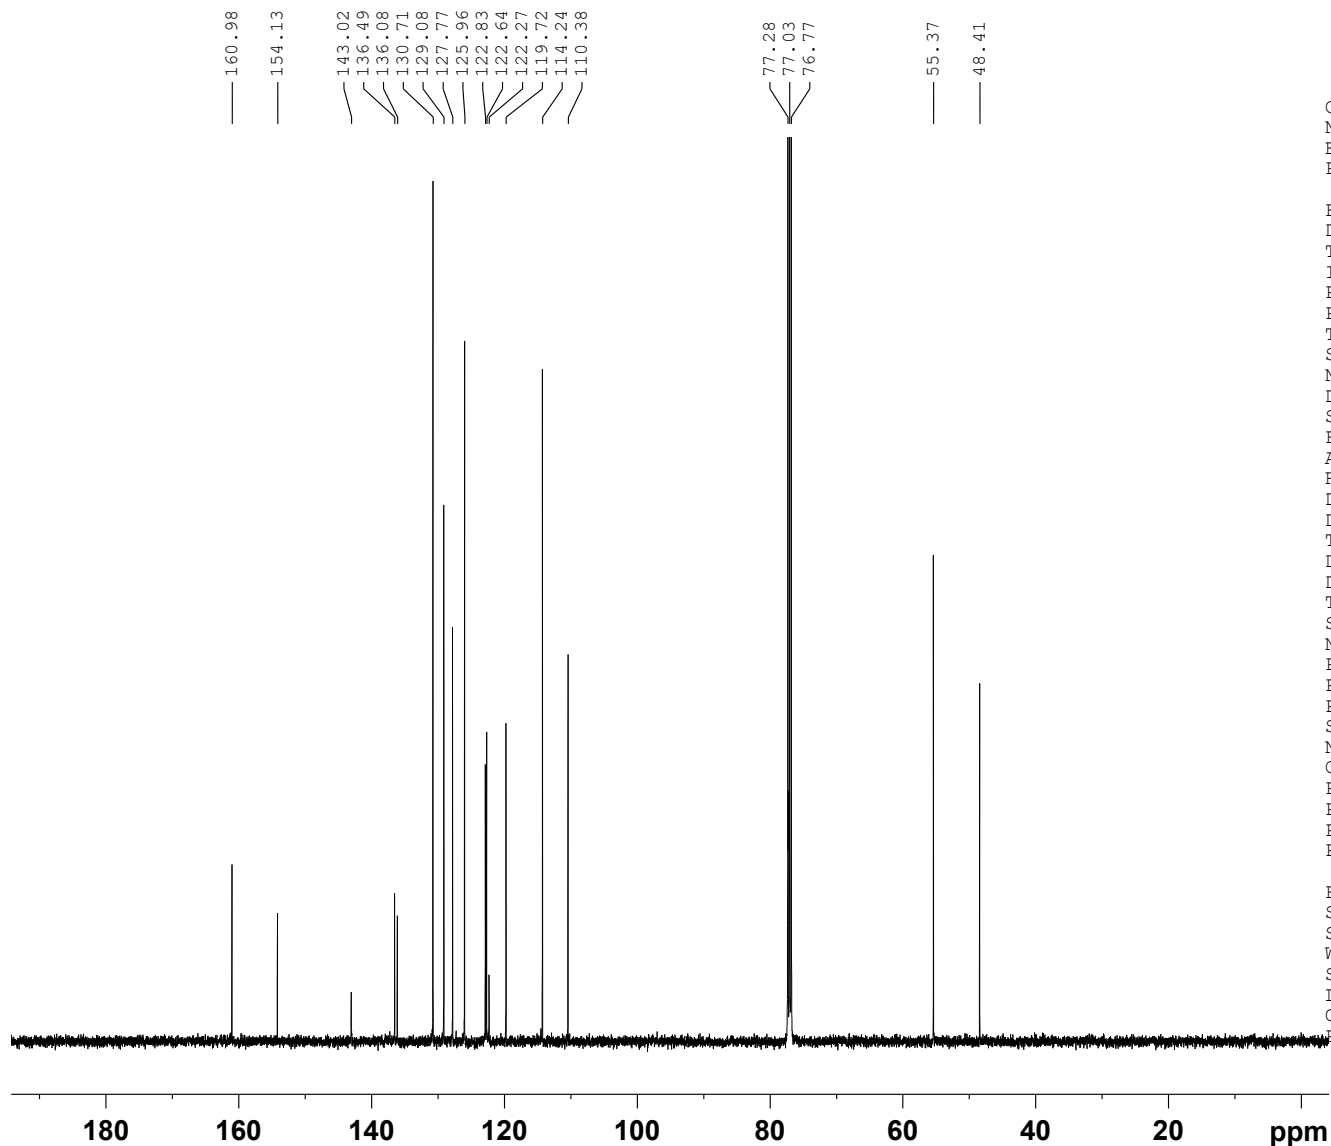

SAIF, PANJAB UNIVERSITY CHANDIGARH

SYNAPT-XS#DBA064

05-Aug-2021  
11:37:31  
1: TOF MS ES+  
5.60e7

NARENDRA OCH-3 BC 357 (6.249) Cm (355.361)

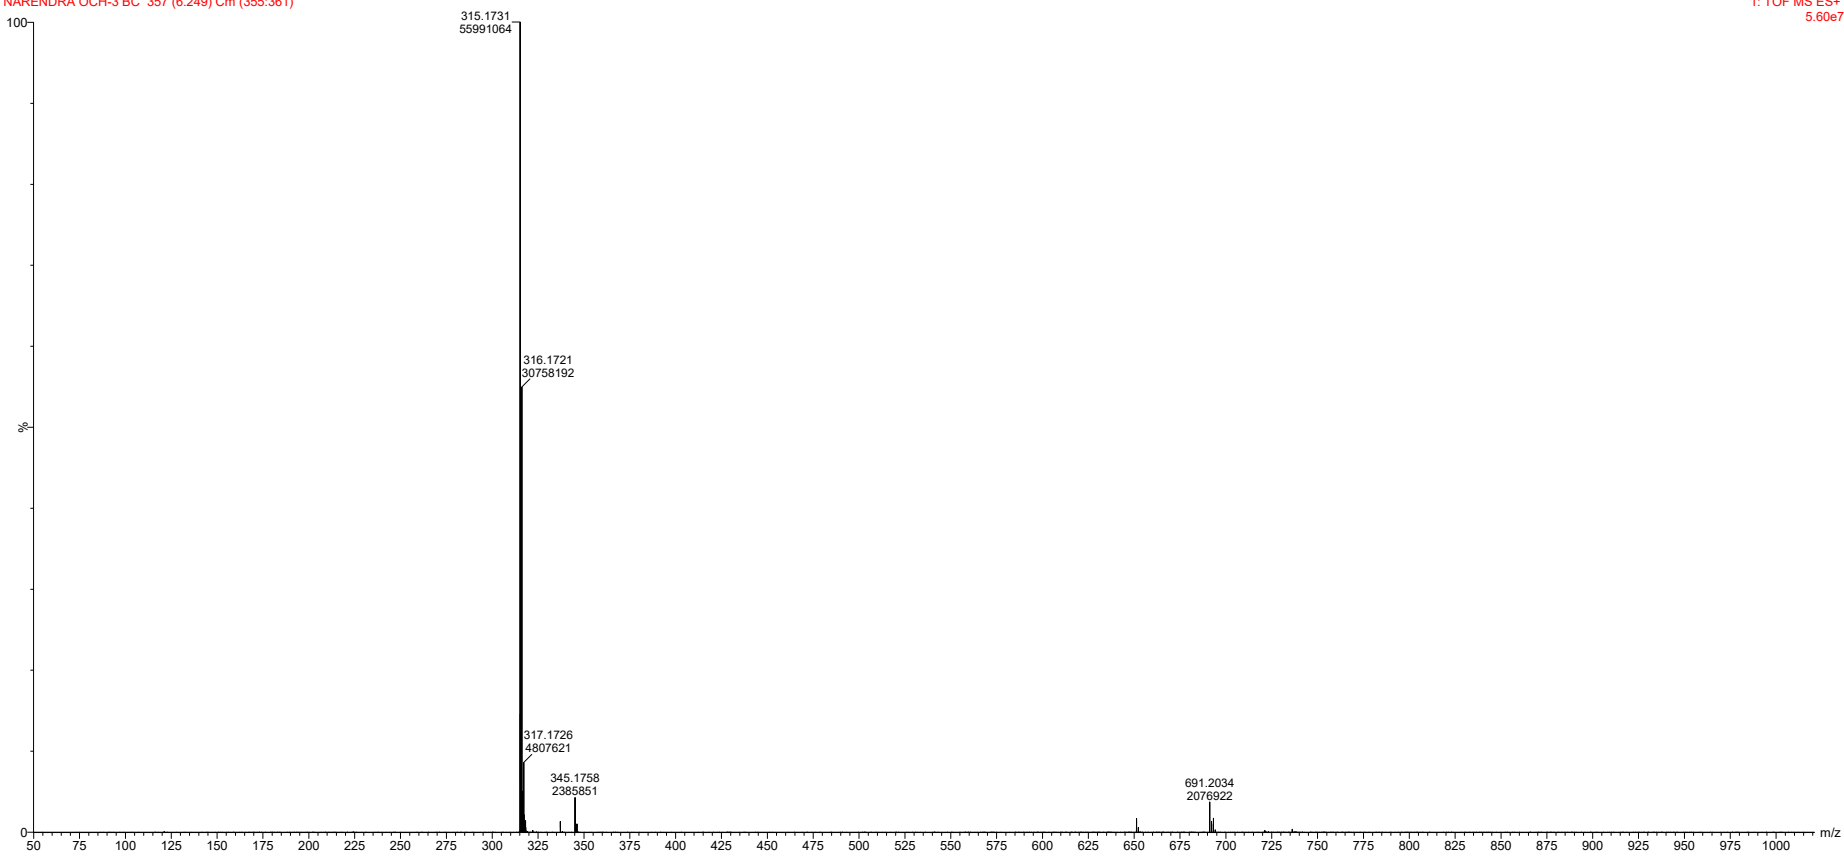

4.2-SP  
 1H\_8scan CDC13 {D:\Spectra} nmr 11

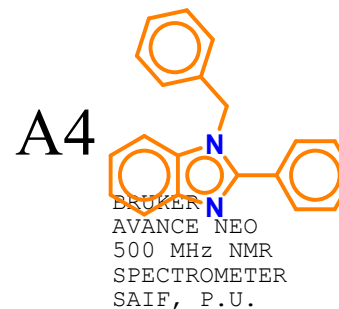

7.7119  
 7.7082  
 7.5073  
 7.5056  
 7.5004  
 7.4968  
 7.4933  
 7.4906  
 7.4876  
 7.4819  
 7.4791  
 7.4761  
 7.4639  
 7.4584  
 7.3766  
 7.3728  
 7.3590  
 7.3555  
 7.3448  
 7.3392  
 7.3352  
 7.3323  
 7.3291  
 7.3258  
 7.3214  
 7.2843  
 7.2675  
 7.2654  
 7.2539  
 7.2519  
 7.2477  
 7.2460  
 7.2317  
 7.1419  
 7.1390  
 7.1255  
 5.4879

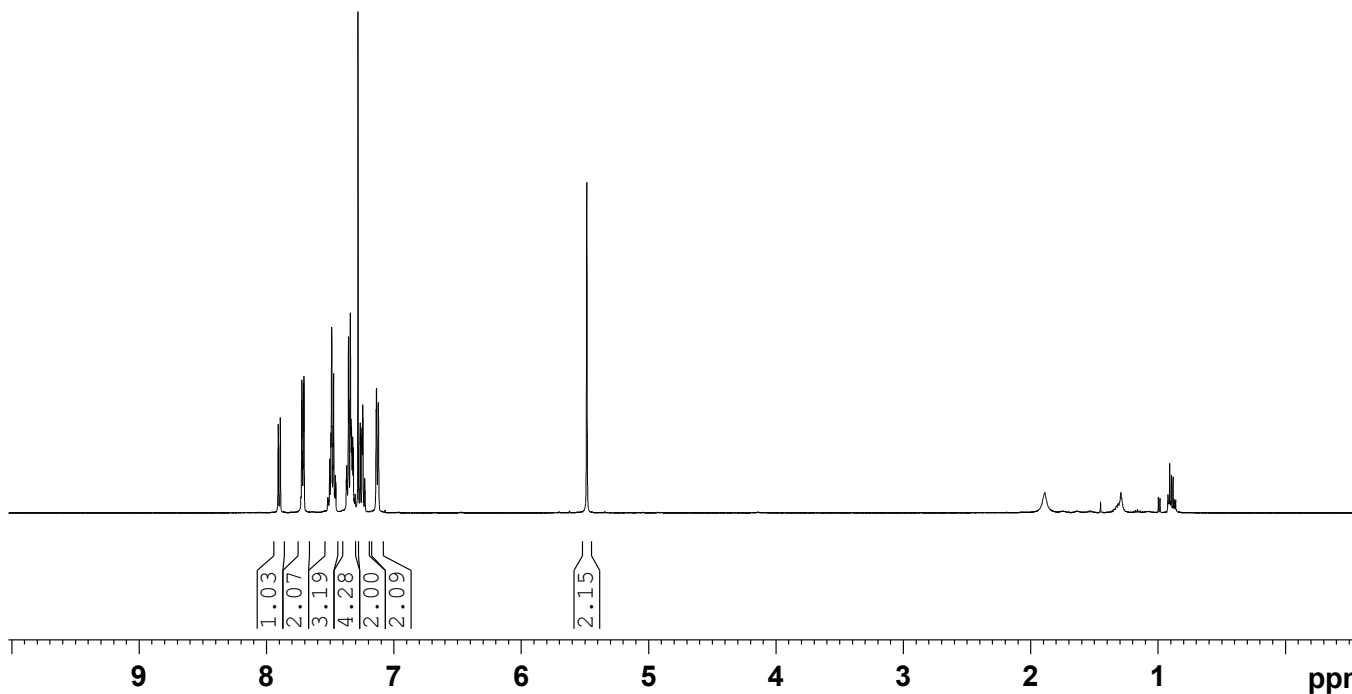

Current Data Parameters  
 NAME Jun23-2021  
 EXPNO 110  
 PROCNO 1

F2 - Acquisition Parameters  
 Date\_ 20210624  
 Time\_ 0.31 h  
 INSTRUM Avance Neo 500  
 PROBHD Z119470\_0333 (  
 PULPROG zg30  
 TD 65536  
 SOLVENT CDC13  
 NS 16  
 DS 0  
 SWH 14705.883 Hz  
 FIDRES 0.448788 Hz  
 AQ 2.2282240 sec  
 RG 101  
 DW 34.000 usec  
 DE 6.79 usec  
 TE 300.2 K  
 D1 1.00000000 sec  
 TD0 1  
 SFO1 500.1730885 MHz  
 NUC1 1H  
 P0 3.33 usec  
 P1 10.00 usec  
 PLW1 20.93000031 W

F2 - Processing parameters  
 SI 65536  
 SF 500.1700000 MHz  
 WDW EM  
 SSB 0  
 LB 0.30 Hz  
 GB 0  
 PC 1.00

4.2-SP  
C13CPD CDC13 {D:\Spectra} nmr 11

BRUKER  
AVANCE NEO  
500 MHz NMR SPECTROMETER  
SAIF, PANJAB UNIVERSITY,  
CHANDIGARH

Current Data Parameters  
NAME Jun23-2021  
EXPNO 111  
PROCNO 1

F2 - Acquisition Parameters  
Date\_ 20210624  
Time\_ 1.22 h  
INSTRUM Avance Neo 500  
PROBHD Z119470\_0333 (  
PULPROG zgpg30  
TD 65536  
SOLVENT CDC13  
NS 1024  
DS 4  
SWH 37037.035 Hz  
FIDRES 1.130281 Hz  
AQ 0.8847360 sec  
RG 101  
DW 13.500 usec  
DE 6.50 usec  
TE 300.2 K  
D1 2.00000000 sec  
D11 0.03000000 sec  
TD0 1  
SFO1 125.7804233 MHz  
NUC1 13C  
P0 3.33 usec  
P1 10.00 usec  
PLW1 83.14099884 W  
SFO2 500.1720007 MHz  
NUC2 1H  
CPDPRG[2] waltz65  
PCPD2 80.00 usec  
PLW2 20.93000031 W  
PLW12 0.32703000 W  
PLW13 0.16449000 W

F2 - Processing parameters  
SI 32768  
SF 125.7678465 MHz  
WDW EM  
SSB 0  
LB 1.00 Hz  
GB 0  
PC 1.40

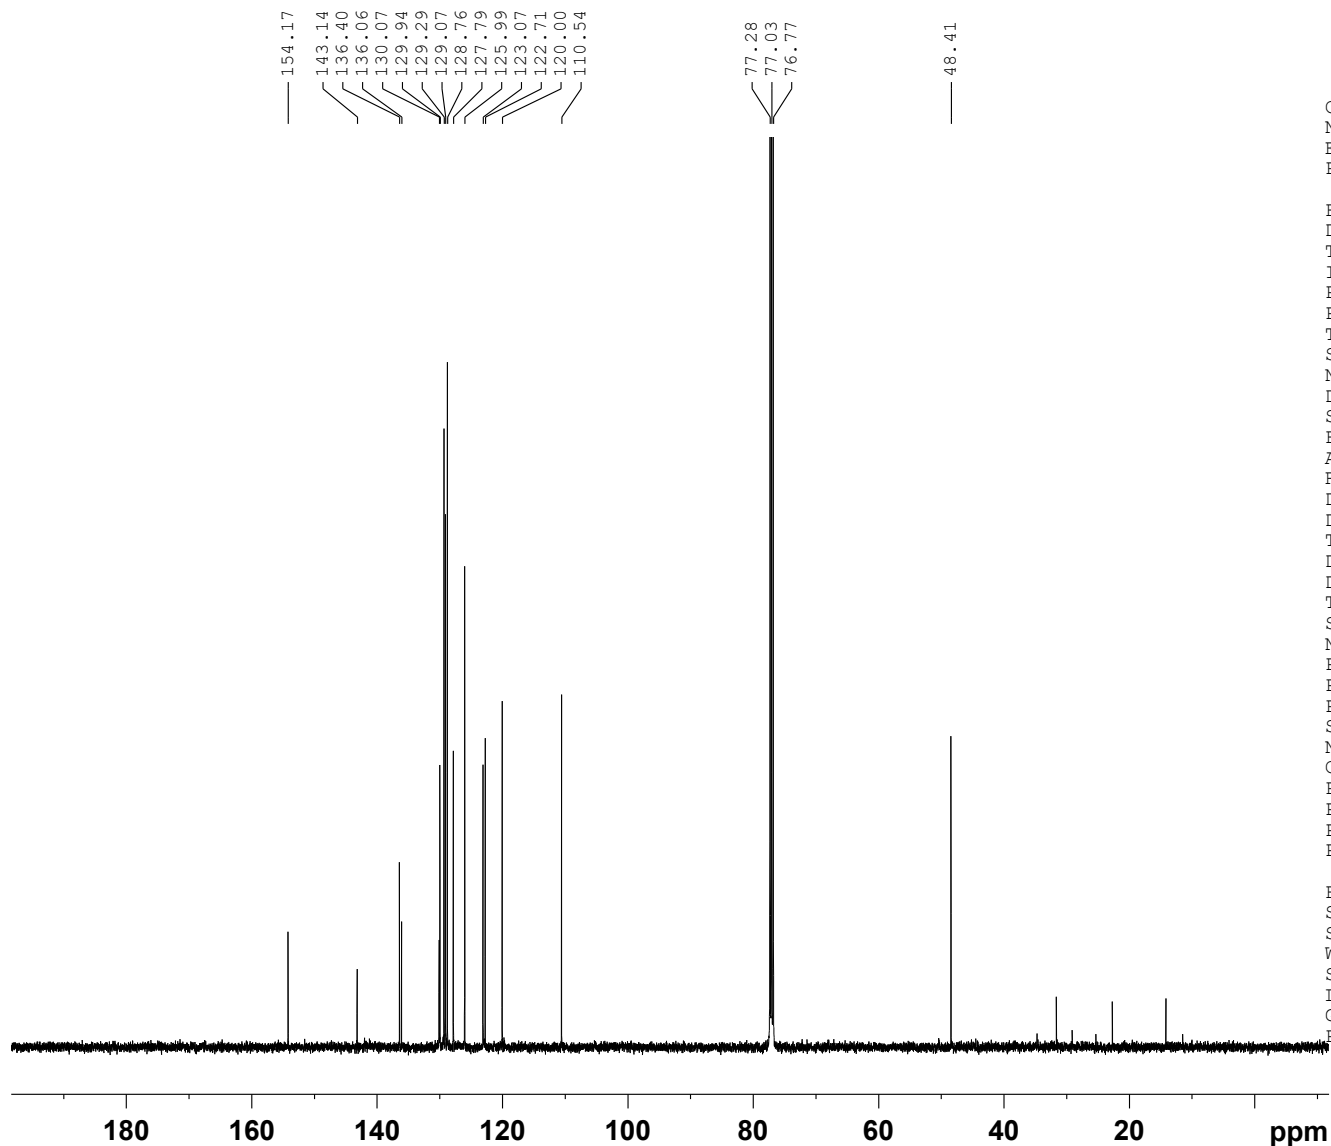

SAIF, PANJAB UNIVERSITY CHANDIGARH

SYNAPT-XS#DBA064

05-Aug-2021  
11:26:45  
1: TOF MS ES+  
4.07e7

NARENDRA 4-2-SP 359 (6.284) Cm (357:363-364:384)

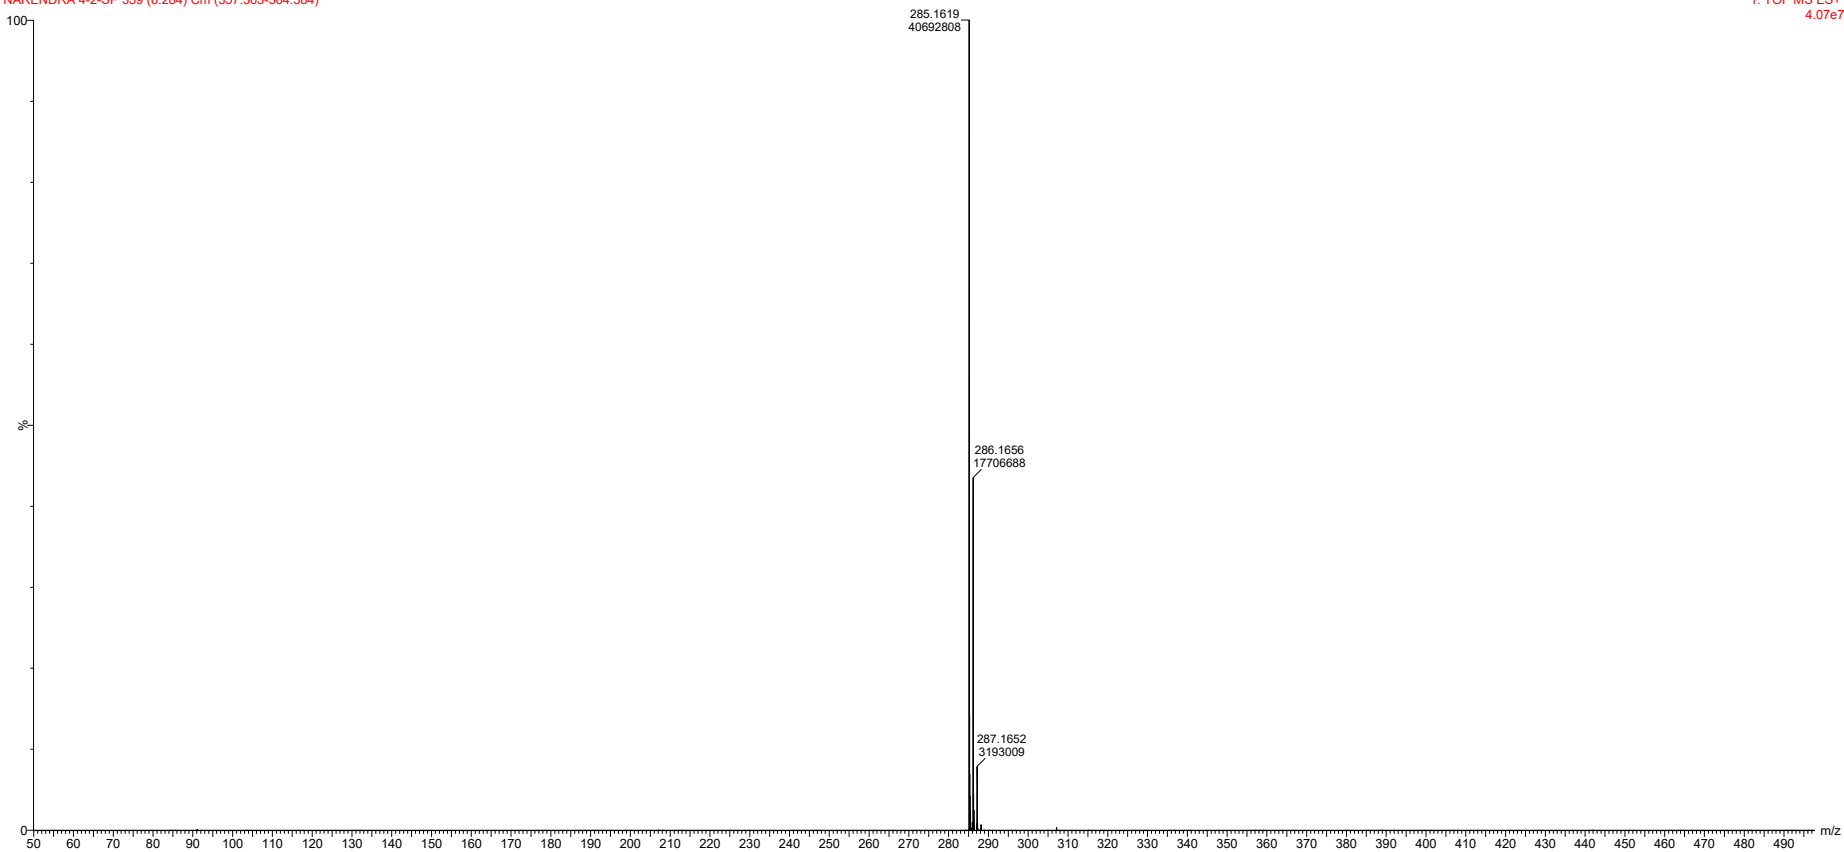

1G  
1H\_8scan DMSO {D:\Spectra} nmr 17

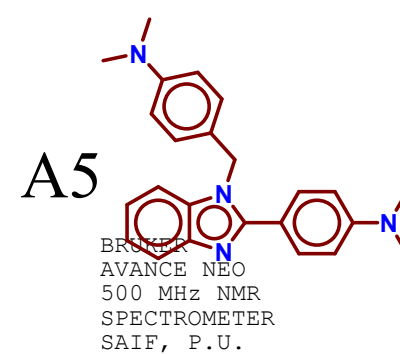

Current Data Parameters  
NAME Mar14-2022  
EXPNO 170  
PROCNO 1

F2 - Acquisition Parameters  
Date\_ 20220314  
Time\_ 12.11 h  
INSTRUM Avance Neo 500  
PROBHD Z119470\_0333 (   
PULPROG zg30  
TD 65536  
SOLVENT DMSO  
NS 16  
DS 0  
SWH 14705.883 Hz  
FIDRES 0.448788 Hz  
AQ 2.2282240 sec  
RG 95.7854  
DW 34.000 usec  
DE 6.79 usec  
TE 300.2 K  
D1 1.00000000 sec  
TD0 1  
SFO1 500.1730885 MHz  
NUC1 1H  
P0 3.33 usec  
P1 10.00 usec  
PLW1 20.93000031 W

F2 - Processing parameters  
SI 65536  
SF 500.1700039 MHz  
WDW EM  
SSB 0  
LB 0.30 Hz  
GB 0  
PC 1.00

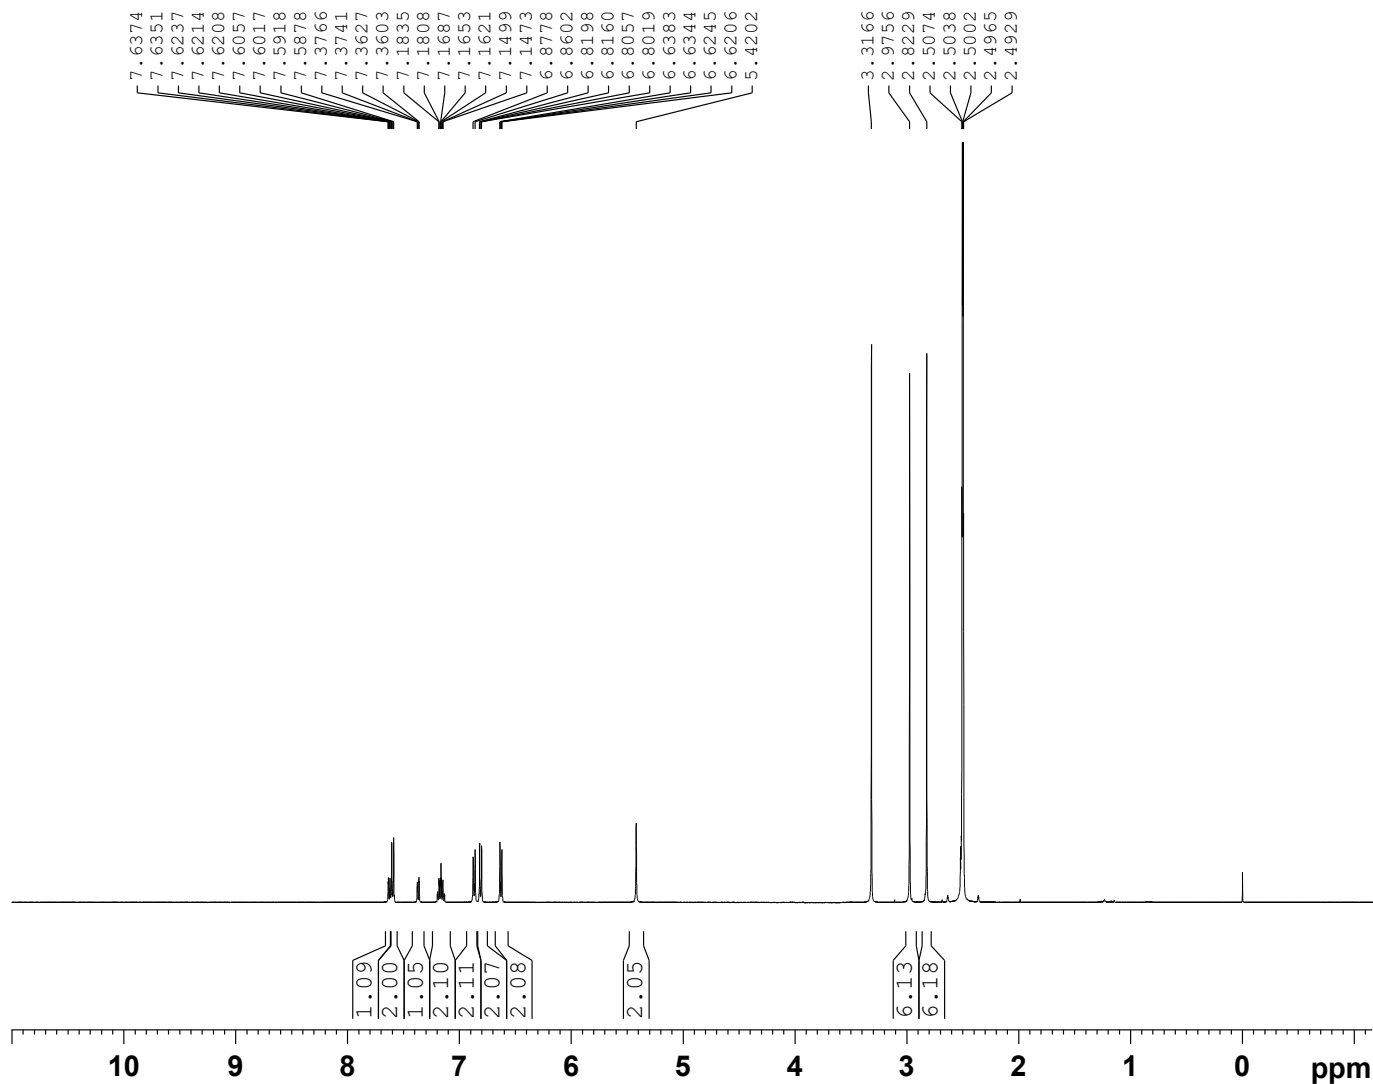

1G  
C13CPD DMSO {D:\Spectra} nmr 17

153.86  
150.83  
149.58  
142.78  
135.91  
129.75  
126.78  
124.10  
121.64  
121.57  
118.44  
116.91  
112.38  
111.60  
110.64

46.99  
39.58  
39.42  
39.25

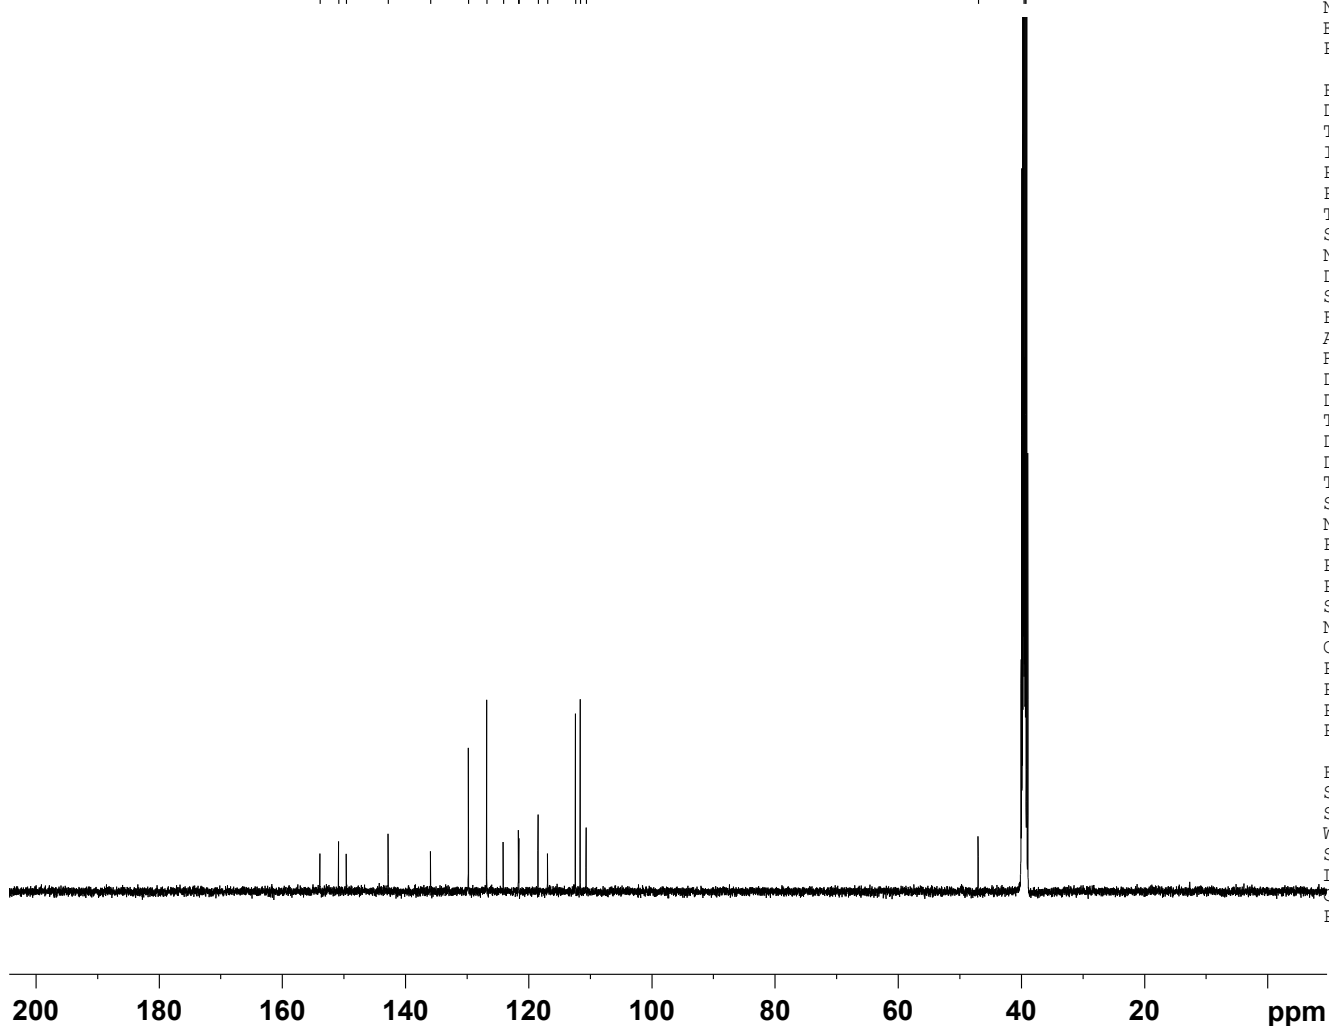

BRUKER  
AVANCE NEO  
500 MHz NMR SPECTROMETER  
SAIF, PANJAB UNIVERSITY,  
CHANDIGARH

Current Data Parameters  
NAME Mar14-2022  
EXPNO 171  
PROCNO 1

F2 - Acquisition Parameters  
Date\_ 20220314  
Time\_ 23.04 h  
INSTRUM Avance Neo 500  
PROBHD Z119470\_0333 (  
PULPROG zgpg30  
TD 65536  
SOLVENT DMSO  
NS 1024  
DS 4  
SWH 37037.035 Hz  
FIDRES 1.130281 Hz  
AQ 0.8847360 sec  
RG 101  
DW 13.500 usec  
DE 6.50 usec  
TE 300.2 K  
D1 2.0000000 sec  
D11 0.0300000 sec  
TD0 1  
SFO1 125.7804233 MHz  
NUC1 13C  
P0 3.33 usec  
P1 10.00 usec  
PLW1 83.14099884 W  
SFO2 500.1720007 MHz  
NUC2 1H  
CPDPRG[2] waltz65  
PCPD2 80.00 usec  
PLW2 20.93000031 W  
PLW12 0.32703000 W  
PLW13 0.16449000 W

F2 - Processing parameters  
SI 32768  
SF 125.7679214 MHz  
WDW EM  
SSB 0  
LB 1.00 Hz  
GB 0  
PC 1.40



NARENDRA IG 6 (0.138) Cm (5.6)

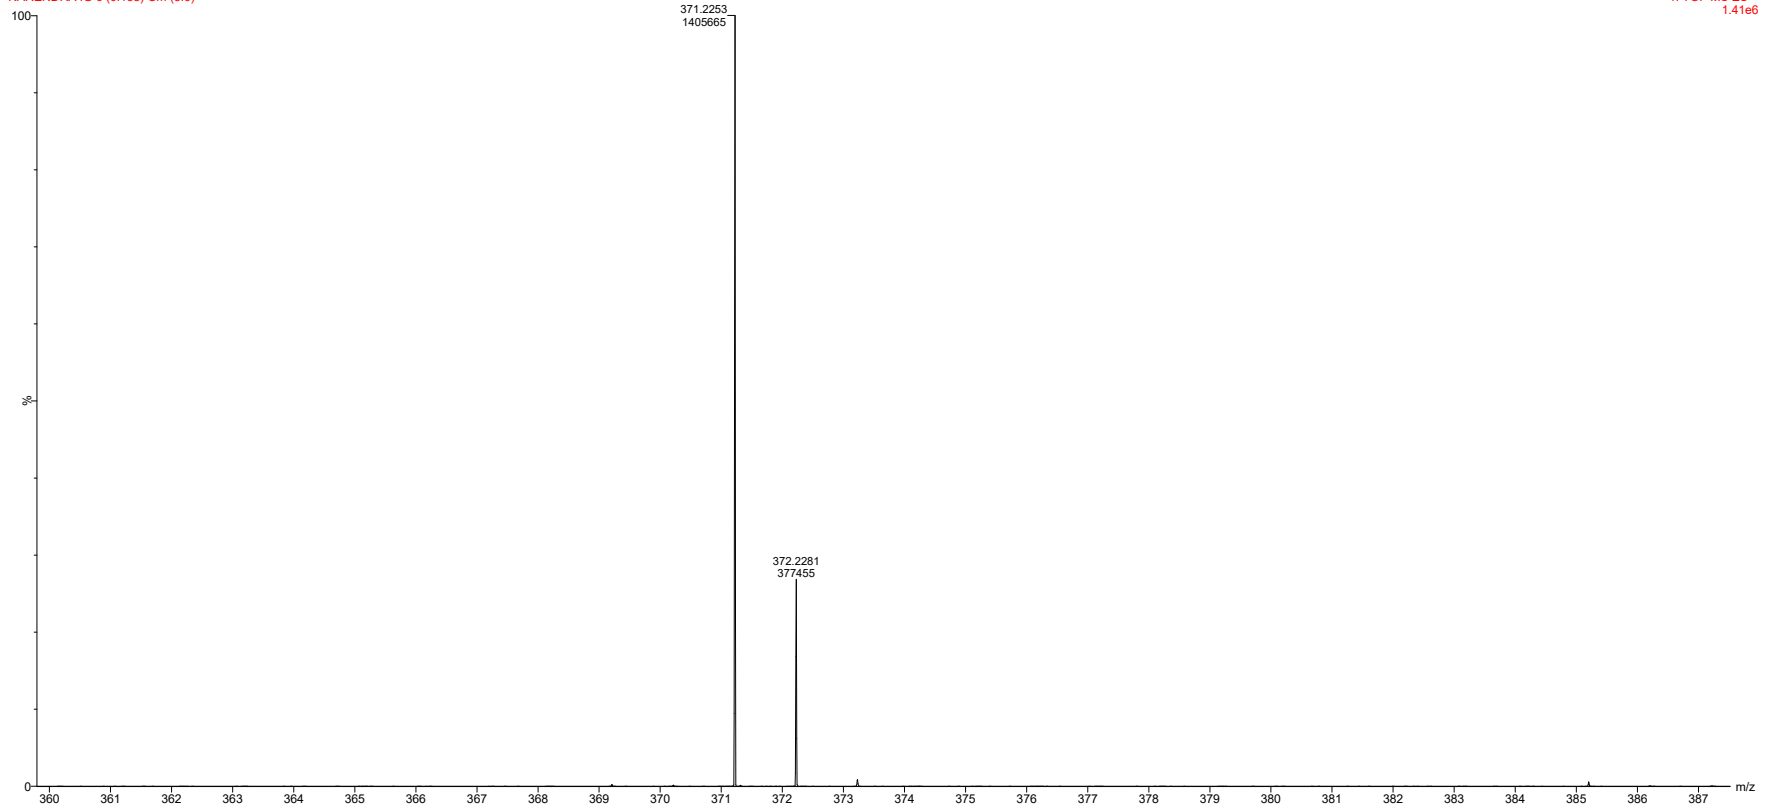

Supplement: d3md00543g1.pdf [file d3md00543g1.pdf]
